# Supplementary material for: A nucleic acid base derivative tethered to a ruthenium carbene complex: hydrogen bonded dimers in both the solid state and solution?
Source: Royal Society of Chemistry journal article supplement (doi:10.1039/b402592j), 2004-01-01
Supplement: b402592j.doc [file b402592j.doc]

## Supplementary Information

A Nucleic Acid Base Derivative Tethered to a Ruthenium Carbene Complex: Hydrogen Bonded Dimers in both the Solid State and Solution?

### Hayrullo Hamidov, John C. Jeffery and Jason M. Lynam

All reactions were performed under an atmosphere of nitrogen using standard Schlenk line techniques. Solvents were dried over appropriate drying agents and distilled prior to use. Ru(5-C5H5)(PPh3)2Cl1 and HC≡CUr2 were prepared using minor modifications of literature procedures. NH4PF6 was obtained from Aldrich and used as supplied.

Complex **3** was prepared as follows. A Schlenk flask fitted with a glass condenser was charged with a stirbar, Ru(5-C5H5)(PPh3)2Cl (1.0 g, 1.4 mmol), HCCUr (326 mg, 2.4 mmol), NH4PF6 (446 mg, 2.7 mmol) and MeOH (*ca.* 50 ml) and heated under reflux for 24 h. During this time the colour of the solution changed from deep red to bright yellow. The solvent was removed *in vacuo* and the resulting residue extracted with dichloromethane. Removal of the solvent from the combined extracts afforded a pale yellow powder which could be recrystallised from MeOH (any residual Ru(5-C5H5)(PPh3)2Cl is insoluble in cold methanol and is removed at this stage *via* filtration). Concentration of the solution and addition of a small quantity of toluene caused the product to precipitate. The precipitate dissolved on warming and slow cooling of the solution afforded crystals of **3** suitable for study by X-ray diffraction. Isolated yields were typically in the region of 40%.

1. M. I. Bruce, C. Hameister, A. G. Swincer and R. C. Wallis, *Inorg. Synth.*, 1982, **21**, 78.

1. J. W. B. Cooke, R. Bright, M. J. Coleman and K. P. Jenkins,  *Organic Process Reseach and Development*, 2001, **5**, 383.

1H NMR spectrum of complex **3** in CD2Cl2 solution at 300K.

31P{1H} NMR spectrum of complex **3** in CD2Cl2 solution at 300K.

13C{1H} NMR spectrum of complex **3** in CD2Cl2 solution at 300K.

Expansion of 13C{1H} NMR spectrum of complex **3** in CD2Cl2 solution at 300K.

Expansion of 13C{1H} NMR spectrum of complex **3** in CD2Cl2 solution at 300K

13C{1H} DEPT 135 NMR spectrum of complex **3** in CD2Cl2 solution at 300K

1H-13C Correlation experiment of complex **3**in CD2Cl2 solution at 300K.
